# Supplementary material
Source: HighWire-hosted journal article supplement (https://bmjopen.bmj.com/content/8/7/e021479)
Supplement: inline-supplementary-material-1 [file inline-supplementary-material-1.pdf]

**Table S1: Baseline characteristics of the Golestan Cohort Study participants**

| Characteristics                      | Total<br>N=50045 | Women<br>N=28811 | Men<br>N=21234 |
|--------------------------------------|------------------|------------------|----------------|
| Age at baseline                      |                  |                  |                |
| • <50                                | 24615 (49.19)    | 14526 (50.42)    | 10089 (47.51)  |
| • 50-59                              | 15573 (31.12)    | 9290 (32.24)     | 6283 (29.59)   |
| • 60-69                              | 7359 (14.70)     | 3918 (13.60)     | 3441 (16.21)   |
| • ≥ 70                               | 2498 (4.99)      | 1077 (3.74)      | 1421 (6.69)    |
| Ethnicity                            |                  |                  |                |
| • Turkman                            | 37253 (74.44)    | 21202 (73.59)    | 16051 (75.59)  |
| • Others                             | 12792 (25.56)    | 7609 (26.41)     | 5183 (24.41)   |
| Marital status                       |                  |                  |                |
| • Married                            | 43955 (87.83)    | 23286 (80.82)    | 20669 (97.34)  |
| • Unmarried*                         | 6090 (12.17)     | 5525 (19.18)     | 565 (2.66)     |
| Residence                            |                  |                  |                |
| • Urban                              | 10034 (20.05)    | 6100 (21.17)     | 3934 (18.53)   |
| • Rural                              | 40011 (79.95)    | 22711 (78.83)    | 17300 (81.47)  |
| Education                            |                  |                  |                |
| • No formal schooling                | 35118 (70.17)    | 24700 (85.73)    | 10418 (49.06)  |
| • Primary Education                  | 8463 (16.91)     | 2914 (10.11)     | 5549 (26.13)   |
| • Middle school or higher            | 6464 (12.92)     | 1197 (4.15)      | 5267 (24.80)   |
| Wealth score (Quintiles)             |                  |                  |                |
| • First                              | 10746 (21.47)    | 6416 (22.27)     | 4330 (20.39)   |
| • Second                             | 9288 (18.56)     | 5450 (18.92)     | 3838 (18.07)   |
| • Third                              | 10874 (21.73)    | 6257 (21.72)     | 4617 (21.74)   |
| • Fourth                             | 9482 (18.95)     | 5383 (18.68)     | 4099 (19.30)   |
| • Fifth                              | 9655 (19.29)     | 5305 (18.41)     | 4350 (20.49)   |
| Alcohol use                          |                  |                  |                |
| • Never used                         | 48316 (96.55)    | 28790 (99.93)    | 19526 (91.96)  |
| • Ever used                          | 1729 (3.45)      | 21 (0.07)        | 1708 (8.04)    |
| Tobacco smoking/Nass chewing         |                  |                  |                |
| • Never used                         | 39170 (78.28)    | 27744 (96.31)    | 11426 (53.82)  |
| • Ever used                          | 10867 (21.72)    | 1063 (3.69)      | 9804 (46.18)   |
| Opium consumption                    |                  |                  |                |
| • Never used                         | 41545 (83.02)    | 26458 (91.83)    | 15087 (71.05)  |
| • Ever used                          | 8500 (16.98)     | 2353 (8.17)      | 6147 (28.95)   |
| Physical activity (MET min/week)     |                  |                  |                |
| • 1 <sup>st</sup> tertile            | 17601 (35.25)    | 4882 (16.98)     | 12719 (60.07)  |
| • 2 <sup>nd</sup> tertile            | 15815 (31.68)    | 11351 (39.84)    | 4464 (21.08)   |
| • 3 <sup>rd</sup> tertile            | 16512 (33.07)    | 12520 (43.54)    | 3992 (18.85)   |
| Body mass index (kg/m <sup>2</sup> ) |                  |                  |                |
| • <18.5                              | 2410 (4.82)      | 1153 (4.00)      | 1257 (5.92)    |
| • 18.5-24.9                          | 17929 (35.83)    | 8317 (28.87)     | 9612 (45.28)   |
| • 25-29.9                            | 16973 (33.92)    | 9701 (33.67)     | 7272 (34.26)   |
| • ≥ 30                               | 12725 (25.43)    | 9637 (33.45)     | 3088 (14.55)   |
| Vegetable/fruit consumption (g/day)  |                  |                  |                |
| • 1 <sup>st</sup> tertile            | 16390 (33.33)    | 10393 (36.73)    | 5997 (28.73)   |
| • 2 <sup>nd</sup> tertile            | 16390 (33.33)    | 9544 (33.73)     | 6846 (32.80)   |
| • 3 <sup>rd</sup> tertile            | 16390 (33.33)    | 8358 (29.54)     | 8032 (38.48)   |
| High blood pressure                  |                  |                  |                |
| • No                                 | 28805 (57.56)    | 15519 (53.86)    | 13286 (62.57)  |
| • Yes                                | 21240 (42.44)    | 13292 (46.14)    | 7948 (37.43)   |
| Diabetes mellitus                    |                  |                  |                |
| • No                                 | 46601 (93.12)    | 26464 (91.85)    | 20137 (94.83)  |
| • Yes                                | 3444 (6.88)      | 2347 (8.15)      | 1097 (5.17)    |

Data are n (%). \*Single, divorced, widowed, and others.



**Table S2: Causes of death in the Golestan Cohort Study (2004-Aug 2017)\***

| Disease classification based on ICD-10 (Version:2016)                                                   | ICD code       | <70                 | ≥70                | All                 |
|---------------------------------------------------------------------------------------------------------|----------------|---------------------|--------------------|---------------------|
| All                                                                                                     |                | <b>4018</b>         | <b>2329</b>        | <b>6347</b>         |
| I Certain infectious and parasitic diseases                                                             | <b>A00-B99</b> | <b>112 (2.79)</b>   | <b>98 (4.21)</b>   | <b>210 (3.31)</b>   |
| Tuberculosis                                                                                            | A15-A19        | 36 (32.14)          | 16 (16.33)         | 52 (24.76)          |
| Others                                                                                                  |                | 76 (67.86)          | 82 (83.67)         | 158 (75.24)         |
| II Neoplasms                                                                                            | <b>C00-D48</b> | <b>858 (21.35)</b>  | <b>384 (16.49)</b> | <b>1242 (19.57)</b> |
| Malignant neoplasm of oesophagus                                                                        | C15            | 153 (17.83)         | 83 (21.61)         | 236 (19.00)         |
| Malignant neoplasm of stomach                                                                           | C16            | 155 (18.07)         | 83 (21.61)         | 238 (19.16)         |
| Malignant neoplasm of colorectal                                                                        | C18-20         | 47 (5.48)           | 18 (4.69)          | 65 (5.23)           |
| Malignant neoplasms of hepatobiliary organs                                                             | C22-24         | 52 (6.06)           | 23 (5.99)          | 75 (6.04)           |
| Malignant neoplasm of pancreas                                                                          | C25            | 52 (6.06)           | 27 (7.03)          | 79 (6.36)           |
| Malignant neoplasms of other digestive organs                                                           |                | 7 (0.82)            | 1 (0.26)           | 8 (0.64)            |
| Malignant neoplasm of bronchus and lung                                                                 | C34            | 61 (7.11)           | 22 (5.73)          | 83 (6.68)           |
| Malignant neoplasm of breast                                                                            | C50            | 27 (3.15)           | 1 (0.26)           | 28 (2.25)           |
| Malignant neoplasms of female genital organs                                                            | C51-58         | 56 (6.53)           | 6 (1.56)           | 62 (4.99)           |
| Malignant neoplasms of male genital organs                                                              | C60-63         | 9 (1.05)            | 16 (4.17)          | 25 (2.01)           |
| Malignant neoplasms of urinary tract                                                                    | C64-C68        | 24 (2.80)           | 11 (2.86)          | 35 (2.82)           |
| Malignant neoplasms of eye, brain and other parts of central nervous system                             | C69-72         | 47 (5.48)           | 10 (2.60)          | 57 (4.59)           |
| Malignant neoplasms, stated or presumed to be primary, of lymphoid, haematopoietic and related tissue   | C81-96         | 61 (7.11)           | 29 (7.55)          | 90 (7.25)           |
| Other Malignant neoplasms                                                                               |                | 104 (12.12)         | 53 (13.80)         | 157 (12.64)         |
| D00-D48In situ, benign, or unknown                                                                      | D00-D48        | 3 (0.35)            | 1 (0.26)           | 4 (0.32)            |
| III Diseases of the blood and blood-forming organs and certain disorders involving the immune mechanism | <b>D50-D89</b> | <b>1 (0.02)</b>     | <b>1 (0.04)</b>    | <b>2 (0.03)</b>     |
| IV Endocrine, nutritional and metabolic diseases                                                        | <b>E00-E90</b> | <b>54 (1.34)</b>    | <b>14 (0.60)</b>   | <b>68 (1.07)</b>    |
| Diabetes mellitus                                                                                       | E10-E14        | 47 (87.04)          | 13 (92.86)         | 60 (88.24)          |
| Others                                                                                                  |                | 7 (12.96)           | 1 (7.14)           | 8 (11.76)           |
| V Mental and behavioural disorders                                                                      | <b>F00-F99</b> | <b>30 (0.75)</b>    | <b>61 (2.62)</b>   | <b>91 (1.43)</b>    |
| VI Diseases of the nervous system                                                                       | <b>G00-G99</b> | <b>35 (0.87)</b>    | <b>36 (1.55)</b>   | <b>71 (1.12)</b>    |
| VII Diseases of the eye and adnexa                                                                      | <b>H00-H59</b> | <b>0</b>            | <b>0</b>           | <b>0</b>            |
| VIII Diseases of the ear and mastoid process                                                            | <b>H60-H95</b> | <b>0</b>            | <b>0</b>           | <b>0</b>            |
| IX Diseases of the circulatory system                                                                   | <b>I00-I99</b> | <b>1669 (41.54)</b> | <b>922 (39.59)</b> | <b>2591 (40.82)</b> |
| Ischaemic heart diseases                                                                                | I20-I25        | 864 (51.77)         | 371 (40.24)        | 1235 (47.66)        |
| Cardiac arrest                                                                                          | I46            | 180 (10.78)         | 95 (10.30)         | 275 (10.61)         |
| Heart failure                                                                                           | I50            | 106 (6.35)          | 67 (7.27)          | 173 (6.68)          |
| Cerebrovascular diseases                                                                                | I60-I69        | 473 (28.34)         | 354 (38.39)        | 827 (31.92)         |
| Others                                                                                                  |                | 46 (2.76)           | 35 (3.80)          | 81 (3.13)           |
| X Diseases of the respiratory system                                                                    | <b>J00-J99</b> | <b>175 (4.36)</b>   | <b>142 (6.10)</b>  | <b>317 (4.99)</b>   |
| Acute infection                                                                                         | J00-J22        | 43 (24.57)          | 55 (38.73)         | 98 (30.91)          |
| Chronic lower respiratory diseases                                                                      | J40-J47        | 117 (66.86)         | 75 (52.82)         | 192 (60.57)         |
| Others                                                                                                  |                | 15 (8.57)           | 12 (8.45)          | 27 (8.52)           |
| XI Diseases of the digestive system                                                                     | <b>K00-K93</b> | <b>125 (3.11)</b>   | <b>57 (2.45)</b>   | <b>182 (2.87)</b>   |
| Diseases of Liver                                                                                       | K70-77         | 75 (60.00)          | 22 (38.60)         | 97 (53.30)          |
| Others                                                                                                  |                | 50 (40.00)          | 35 (61.40)         | 85 46.70)           |
| XII Diseases of the skin and subcutaneous tissue                                                        | <b>L00-L99</b> | <b>3 (0.07)</b>     | <b>1 (0.04)</b>    | <b>4 (0.06)</b>     |
| XIII Diseases of the musculoskeletal system and connective tissue                                       | <b>M00-M99</b> | <b>9 (0.22)</b>     | <b>0</b>           | <b>9 (0.14)</b>     |
| XIV Diseases of the genitourinary system                                                                | <b>N00-N99</b> | <b>74 (1.84)</b>    | <b>50 (2.15)</b>   | <b>124 (1.95)</b>   |
| Renal failure                                                                                           | N17-N19        | 71 (95.95)          | 48 (96.00)         | 119 (95.97)         |
| Others                                                                                                  |                | 3 (4.05)            | 2 (4.00)           | 5 (4.03)            |
| XV Pregnancy, childbirth and the puerperium                                                             | <b>O00-O99</b> | <b>0</b>            | <b>0</b>           | <b>0</b>            |
| XVI Certain conditions originating in the perinatal period                                              | <b>P00-P96</b> | <b>0</b>            | <b>0</b>           | <b>0</b>            |
| XVII Congenital malformations, deformations and chromosomal abnormalities                               | <b>Q00-Q99</b> | <b>2 (0.05)</b>     | <b>0</b>           | <b>2 (0.03)</b>     |
| XVIII Symptoms, signs and abnormal clinical and laboratory findings, not elsewhere classified           | <b>R00-R99</b> | <b>185 (4.60)</b>   | <b>150 (6.44)</b>  | <b>335 (5.28)</b>   |
| XIX Injury, poisoning and certain other consequences of external causes                                 | <b>S00-T98</b> | <b>9 (0.22)</b>     | <b>6 (0.26)</b>    | <b>15 (0.24)</b>    |
| XX External causes of morbidity and mortality                                                           | <b>V01-Y98</b> | <b>235 (5.85)</b>   | <b>52 (2.23)</b>   | <b>287 (4.52)</b>   |
| Transport accidents                                                                                     | V01-V99        | 166 (70.64)         | 33 (63.46)         | 199 (69.34)         |
| Others                                                                                                  |                | 69 (29.36)          | 19 (36.54)         | 88 (30.66)          |
| XXI Factors influencing health status and contact with health services                                  | <b>Z00-Z99</b> | <b>0</b>            | <b>0</b>           | <b>0</b>            |
| XXII Codes for special purposes                                                                         | <b>U00-U85</b> | <b>0</b>            | <b>0</b>           | <b>0</b>            |

\* Cause of death not yet determined in 797 mortality cases: 442 deaths <70 and 355 deaths ≥70 years. In columns, n (%) of each main subgroups are calculated (Bold); also, within subgroups n (%) are shown, separately.



**Table S3: The top 10 causes of death (Global Health Estimation, WHO Methods) in the Golestan Cohort Study\*, after exclusion of deaths within the first year of follow-up**

|    | 40-49 years<br>N=357       |             | 50-59 years<br>N=1213           |             | 60-69 years<br>N=1710     |             | All premature death (<70)<br>N=3280 |              |
|----|----------------------------|-------------|---------------------------------|-------------|---------------------------|-------------|-------------------------------------|--------------|
| 1  | IHD <sup>a</sup>           | 125 (35.01) | IHD <sup>a</sup>                | 385 (31.74) | IHD <sup>a</sup>          | 589 (34.44) | IHD <sup>a</sup>                    | 1099 (33.51) |
| 2  | Road injury                | 45 (12.61)  | Stroke                          | 153 (12.61) | Stroke                    | 274 (16.02) | Stroke                              | 461 (14.05)  |
| 3  | Stroke                     | 34 (9.52)   | Road injury                     | 59 (4.86)   | Stomach cancer            | 95 (5.56)   | Stomach cancer                      | 159 (4.85)   |
| 4  | Esophagus cancer           | 19 (5.32)   | Stomach cancer                  | 58 (4.78)   | Esophagus cancer          | 83 (4.85)   | Esophagus cancer                    | 153 (4.66)   |
| 5  | Cirrhosis <sup>b</sup>     | 10 (2.80)   | Esophagus cancer                | 51 (4.20)   | COPD <sup>c</sup>         | 64 (3.74)   | Road injury                         | 151 (4.60)   |
| 6  | Breast cancer              | 9 (2.52)    | COPD <sup>c</sup>               | 38 (3.13)   | Road injury               | 47 (2.75)   | COPD <sup>c</sup>                   | 106 (3.23)   |
| 7  | Kidney diseases            | 9 (2.52)    | Kidney diseases                 | 32 (2.64)   | Kidney diseases           | 42 (2.46)   | Kidney diseases                     | 83 (2.53)    |
|    | Liver cancer               | 7 (1.96)    |                                 |             |                           |             |                                     |              |
| 8  | Brain cancers <sup>d</sup> | 7 (1.96)    | Colorectal cancers <sup>e</sup> | 25 (2.06)   | Lung cancers <sup>f</sup> | 35 (2.05)   | Lung cancers <sup>f</sup>           | 63 (1.92)    |
|    | Diabetes mellitus          | 6 (1.68)    |                                 |             |                           |             |                                     |              |
| 9  | Stomach cancer             | 6 (1.68)    | Pancreas cancer                 | 23 (1.90)   | Alzheimer <sup>h</sup>    | 33 (1.93)   | Cirrhosis <sup>b</sup>              | 62 (1.89)    |
|    | Lung cancers <sup>f</sup>  | 5 (1.40)    |                                 |             |                           |             |                                     |              |
| 10 | LRT infection <sup>g</sup> | 5 (1.40)    | Lung cancers <sup>f</sup>       | 23 (1.90)   | Cirrhosis <sup>b</sup>    | 27 (1.58)   | Pancreas cancer                     | 48 (1.46)    |
|    | Ovary cancer               | 4 (1.12)    |                                 |             |                           |             |                                     |              |
|    | Asthma                     | 4 (1.12)    | Ovary cancer                    | 20 (1.65)   |                           |             |                                     |              |

\*After redistribution of the garbage codes (295 Cardiovascular disease cases: I10, I26.9, I46, I47.2, I49.0, and I50; 4 Cancer cases: C76, C80, and C97; and 8 External cause cases: Y10-Y34 and Y87.2); and 158 cases of symptoms, signs and ill-defined conditions (R00-R94, R96-R99). Excluded: 441 undetermined mortality causes.

<sup>a</sup>Ischemic heart disease, <sup>b</sup>Cirrhosis of the liver, <sup>c</sup>Chronic obstructive respiratory diseases, <sup>d</sup>Brain and nervous system cancers, <sup>e</sup>Colon and rectum cancers,

<sup>f</sup>Trachea, bronchus, lung cancers, <sup>g</sup>Lower respiratory tract infection, <sup>h</sup>Alzheimer and other dementias.



**Table S4: Hazard ratios for associations between demographic and lifestyle risk factors and premature mortality after exclusion of deaths within the first year of follow-up, in the Golestan Cohort Study\***

| Variable                                   | Adjusted HR<br>(95% CI) ** |
|--------------------------------------------|----------------------------|
| <b>Sex</b>                                 |                            |
| • Women                                    | 1                          |
| • Men                                      | 1.39 (1.25-1.54)           |
| <b>Ethnicity</b>                           |                            |
| • Turkman                                  | 1                          |
| • Non-Turkman                              | 0.99 (0.91-1.08)           |
| <b>Marital Status</b>                      |                            |
| • Married                                  | 1                          |
| • Other                                    | 1.17 (1.05-1.31)           |
| <b>Residence</b>                           |                            |
| • Urban                                    | 1                          |
| • Rural                                    | 0.91 (0.82-1.02)           |
| <b>Education</b>                           |                            |
| • No formal schooling                      | 1                          |
| • Primary Education                        | 0.86 (0.77-0.96)           |
| • Middle school or higher                  | 0.84 (0.73-0.97)           |
| <b>Wealth Score</b>                        |                            |
| • 1 <sup>st</sup> quintile                 | 1                          |
| • 2 <sup>nd</sup> quintile                 | 0.88 (0.79-0.97)           |
| • 3 <sup>rd</sup> quintile                 | 0.69 (0.62-0.77)           |
| • 4 <sup>th</sup> quintile                 | 0.70 (0.63-0.79)           |
| • 5 <sup>th</sup> quintile                 | 0.56 (0.49-0.64)           |
| <b>Alcohol Use</b>                         |                            |
| • Never                                    | 1                          |
| • Ever used                                | 1.02 (0.87-1.21)           |
| <b>Tobacco Smoking/Nass chewing</b>        |                            |
| • Never                                    | 1                          |
| • Ever used                                | 1.39 (1.25-1.54)           |
| <b>Opium Consumption</b>                   |                            |
| • Never                                    | 1                          |
| • Ever used                                | 1.67 (1.52-1.83)           |
| <b>Physical Activity (MET min/week)</b>    |                            |
| • 1 <sup>st</sup> Tertile                  | 1                          |
| • 2 <sup>nd</sup> Tertile                  | 0.83 (0.76-0.90)           |
| • 3 <sup>rd</sup> Tertile                  | 0.68 (0.62-0.75)           |
| <b>Body Mass Index (kg/m<sup>2</sup>)</b>  |                            |
| • <18.5                                    | 1.38 (1.20-1.59)           |
| • 18.5-24.9                                | 1                          |
| • 25-29.9                                  | 0.97 (0.89-1.06)           |
| • ≥30                                      | 0.93 (0.84-1.03)           |
| <b>Vegetable/Fruit Consumption (g/day)</b> |                            |
| • 1 <sup>st</sup> Tertile                  | 1                          |
| • 2 <sup>nd</sup> Tertile                  | 0.97 (0.89-1.06)           |
| • 3 <sup>rd</sup> Tertile                  | 0.88 (0.80-0.97)           |
| <b>High Blood Pressure</b>                 |                            |
| • No                                       | 1                          |
| • Yes                                      | 1.50 (1.39-1.62)           |
| <b>Diabetes Mellitus</b>                   |                            |
| • No                                       | 1                          |
| • Yes                                      | 2.39 (2.14-2.66)           |

\*Exclude: age ≥70 years at baseline and history of ischemic heart disease, stroke, or cancer. \*\*Adjusted for age at enrolment and all variables listed.



**Table S5: Hazard ratios for associations between demographic and lifestyle risk factors and premature mortality based on sex, in the Golestan Cohort Study\***

| Variable                                   | Men<br>HR (95% CI) ** | Women<br>HR (95% CI) ** |
|--------------------------------------------|-----------------------|-------------------------|
| <b>Ethnicity</b>                           |                       |                         |
| • Turkman                                  | 1                     | 1                       |
| • Non-Turkman                              | 0.94 (0.83-1.06)      | 1.03 (0.91-1.17)        |
| <b>Marital Status</b>                      |                       |                         |
| • Married                                  | 1                     | 1                       |
| • Other                                    | 1.44 (1.13-1.84)      | 1.08 (0.96-1.23)        |
| <b>Residence</b>                           |                       |                         |
| • Urban                                    | 1                     | 1                       |
| • Rural                                    | 0.84 (0.72-0.97)      | 0.96 (0.83-1.12)        |
| <b>Education</b>                           |                       |                         |
| • No formal schooling                      | 1                     | 1                       |
| • Primary Education                        | 0.83 (0.73-0.94)      | 0.95 (0.75-1.20)        |
| • Middle school or higher                  | 0.87 (0.75-1.02)      | 0.41 (0.24-0.70)        |
| <b>Wealth Score</b>                        |                       |                         |
| • 1 <sup>st</sup> quintile                 | 1                     | 1                       |
| • 2 <sup>nd</sup> quintile                 | 0.87 (0.76-0.99)      | 0.98 (0.85-1.13)        |
| • 3 <sup>rd</sup> quintile                 | 0.71 (0.62-0.82)      | 0.70 (0.60-0.82)        |
| • 4 <sup>th</sup> quintile                 | 0.72 (0.61-0.83)      | 0.75 (0.63-0.88)        |
| • 5 <sup>th</sup> quintile                 | 0.54 (0.45-0.64)      | 0.67 (0.55-0.81)        |
| <b>Alcohol Use</b>                         |                       |                         |
| • Never                                    | 1                     | 1                       |
| • Ever used                                | 1.05 (0.89-1.24)      | 0.58 (0.08-4.10)        |
| <b>Tobacco Smoking/Nass chewing</b>        |                       |                         |
| • Never                                    | 1                     | 1                       |
| • Ever used                                | 1.42 (1.27-1.58)      | 1.45 (1.18-1.79)        |
| <b>Opium Consumption</b>                   |                       |                         |
| • Never                                    | 1                     | 1                       |
| • Ever used                                | 1.51 (1.36-1.69)      | 2.01 (1.74-2.32)        |
| <b>Physical Activity (MET min/week)</b>    |                       |                         |
| • 1 <sup>st</sup> Tertile                  | 1                     | 1                       |
| • 2 <sup>nd</sup> Tertile                  | 0.84 (0.74-0.95)      | 0.75 (0.66-0.85)        |
| • 3 <sup>rd</sup> Tertile                  | 0.83 (0.73-0.95)      | 0.55 (0.48-0.64)        |
| <b>Body Mass Index (kg/m<sup>2</sup>)</b>  |                       |                         |
| • <18.5                                    | 1.47 (1.24-1.73)      | 1.27 (1.01-1.58)        |
| • 18.5-24.9                                | 1                     | 1                       |
| • 25-29.9                                  | 1.00 (0.90-1.13)      | 0.90 (0.79-1.02)        |
| • ≥30                                      | 1.06 (0.91-1.23)      | 0.82 (0.72-0.95)        |
| <b>Vegetable/Fruit Consumption (g/day)</b> |                       |                         |
| • 1 <sup>st</sup> Tertile                  | 1                     | 1                       |
| • 2 <sup>nd</sup> Tertile                  | 0.92 (0.82-1.04)      | 0.99 (0.88-1.11)        |
| • 3 <sup>rd</sup> Tertile                  | 0.84 (0.75-0.95)      | 0.90 (0.79-1.03)        |
| <b>High Blood Pressure</b>                 |                       |                         |
| • No                                       | 1                     | 1                       |
| • Yes                                      | 1.48 (1.34-1.63)      | 1.52 (1.36-1.69)        |
| <b>Diabetes Mellitus</b>                   |                       |                         |
| • No                                       | 1                     | 1                       |
| • Yes                                      | 2.48 (2.12-2.91)      | 2.29 (1.98-2.63)        |

\*Exclude: age ≥70 years at baseline and history of ischemic heart disease, stroke, or cancer. \*\*Adjusted for age at enrolment and all variables listed.



**Table S6: Hazard ratios for associations between demographic and lifestyle risk factors and premature mortality based on age, in the Golestan Cohort Study\***

| Variable                                   | <55 years<br>HR (95% CI) ** | ≥55 years<br>HR (95% CI) ** |
|--------------------------------------------|-----------------------------|-----------------------------|
| <b>Sex</b>                                 |                             |                             |
| • Women                                    | 1                           | 1                           |
| • Men                                      | 1.48 (1.30-1.70)            | 1.23 (1.06-1.42)            |
| <b>Ethnicity</b>                           |                             |                             |
| • Turkman                                  | 1                           | 1                           |
| • Non-Turkman                              | 1.01 (0.90-1.14)            | 0.98 (0.86-1.11)            |
| <b>Marital Status</b>                      |                             |                             |
| • Married                                  | 1                           | 1                           |
| • Other                                    | 1.42 (1.20-1.67)            | 1.00 (0.86-1.16)            |
| <b>Residence</b>                           |                             |                             |
| • Urban                                    | 1                           | 1                           |
| • Rural                                    | 0.94 (0.81-1.08)            | 0.87 (0.75-1.02)            |
| <b>Education</b>                           |                             |                             |
| • No formal schooling                      | 1                           | 1                           |
| • Primary Education                        | 0.83 (0.72-0.94)            | 0.88 (0.73-1.05)            |
| • Middle school or higher                  | 0.81 (0.68-0.96)            | 0.90 (0.70-1.15)            |
| <b>Wealth Score</b>                        |                             |                             |
| • 1 <sup>st</sup> quintile                 | 1                           | 1                           |
| • 2 <sup>nd</sup> quintile                 | 0.87 (0.77-1.00)            | 0.95 (0.82-1.10)            |
| • 3 <sup>rd</sup> quintile                 | 0.70 (0.61-0.80)            | 0.70 (0.60-0.81)            |
| • 4 <sup>th</sup> quintile                 | 0.74 (0.63-0.86)            | 0.70 (0.59-0.82)            |
| • 5 <sup>th</sup> quintile                 | 0.55 (0.46-0.66)            | 0.61 (0.50-0.75)            |
| <b>Alcohol Use</b>                         |                             |                             |
| • Never                                    | 1                           | 1                           |
| • Ever used                                | 0.99 (0.80-1.23)            | 1.10 (0.86-1.41)            |
| <b>Tobacco Smoking/Nass chewing</b>        |                             |                             |
| • Never                                    | 1                           | 1                           |
| • Ever used                                | 1.53 (1.34-1.75)            | 1.23 (1.07-1.42)            |
| <b>Opium Consumption</b>                   |                             |                             |
| • Never                                    | 1                           | 1                           |
| • Ever used                                | 1.71 (1.52-1.93)            | 1.67 (1.47-1.91)            |
| <b>Physical Activity (MET min/week)</b>    |                             |                             |
| • 1 <sup>st</sup> Tertile                  | 1                           | 1                           |
| • 2 <sup>nd</sup> Tertile                  | 0.86 (0.76-0.96)            | 0.76 (0.67-0.86)            |
| • 3 <sup>rd</sup> Tertile                  | 0.68 (0.60-0.78)            | 0.67 (0.57-0.78)            |
| <b>Body Mass Index (kg/m<sup>2</sup>)</b>  |                             |                             |
| • <18.5                                    | 1.53 (1.28-1.83)            | 1.26 (1.03-1.53)            |
| • 18.5-24.9                                | 1                           | 1                           |
| • 25-29.9                                  | 1.04 (0.92-1.17)            | 0.87 (0.77-0.99)            |
| • ≥30                                      | 1.00 (0.88-1.15)            | 0.82 (0.70-0.95)            |
| <b>Vegetable/Fruit Consumption (g/day)</b> |                             |                             |
| • 1 <sup>st</sup> Tertile                  | 1                           | 1                           |
| • 2 <sup>nd</sup> Tertile                  | 0.97 (0.86-1.08)            | 0.94 (0.83-1.06)            |
| • 3 <sup>rd</sup> Tertile                  | 0.88 (0.78-1.00)            | 0.86 (0.75-0.98)            |
| <b>High Blood Pressure</b>                 |                             |                             |
| • No                                       | 1                           | 1                           |
| • Yes                                      | 1.53 (1.39-1.69)            | 1.46 (1.31-1.62)            |
| <b>Diabetes Mellitus</b>                   |                             |                             |
| • No                                       | 1                           | 1                           |
| • Yes                                      | 2.45 (2.10-2.84)            | 2.31 (1.99-2.68)            |

\*Exclude: age ≥70 years at baseline and history of ischemic heart disease, stroke, or cancer. \*\*Adjusted for age at enrolment and all variables listed.
